# Supplementary material for: Poly-γ-Glutamic Acids Contribute to Biofilm Formation and Plant Root Colonization in Selected Environmental Isolates of Bacillus subtilis
Source: PubMed Central journal article supplement (PMC5102903; doi:10.3389/fmicb.2016.01811), 2016-11-10
Supplement: Data_Sheet_1.pdf [file Data_Sheet_1.pdf]

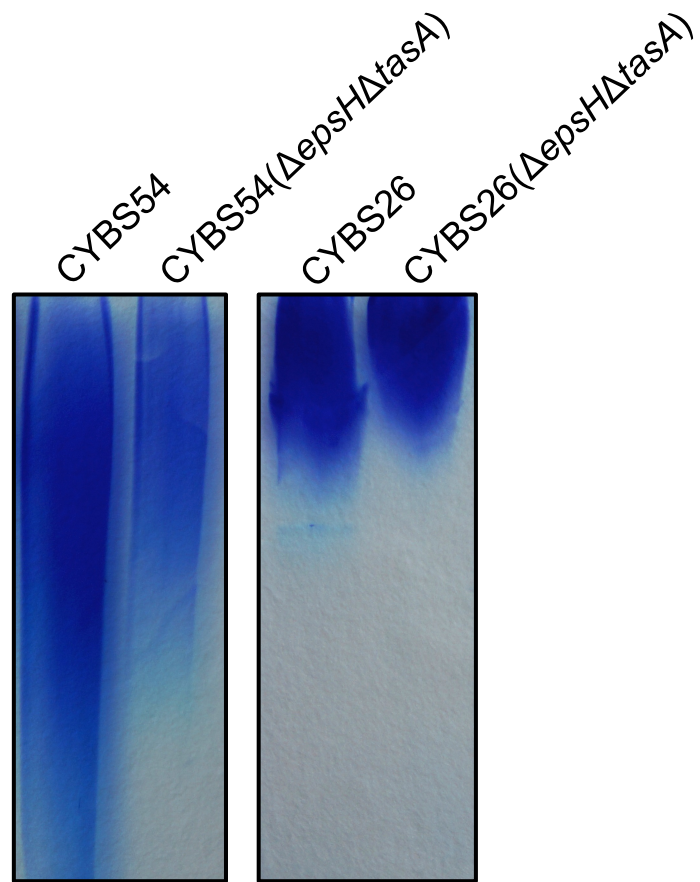

Supplemental Figure 1

```

3610 GATTGATTTGAAATGCATATTTAAATACAAACAGCAGGGTGTGACTATACGTCCAGAAGGATATCAGGAGAAAAAT
SM21 GATTGATTTGAAATGCATATTTAAACACAAACACCAGGGTGTGACTATACGTCCAGAAGGATATCAGGCGAAAAAT
CYBS9 GATTGATTTGAAATGCATATTTAAACACAAACACCAGGGTGTGACTATACGTCCAGAAGGATATCAGGCGAAAAAT
CYBS14 GATTGATTTGAAATGCATATTTAAATACAAACAGCAGGGTGTGACTATACGTCCAGAAGGATATCAGGAGAAAAAT
CYBS26 GATTGATTTGAAATGCATATTTAAATACAAACAGCAGGGTGTGACTATACGTCCAGAAGGATATCAGGAGAAAAAT
CYBS54 GATTGATTTGAAATGCATATTTAAATACAAACAGCAAGGGTGTGACTATACGTCCAGAAGGATATCAGGAGAAAAAT
*****.*****.**:*****.*****

```

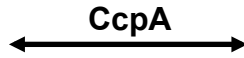

```

3610 GAAAGCGCATTCTCTTTGATTTTTTTAAAAAGTGATAAAGGTAATAAGTCCTGCTGTTTTCCAAAAATAGAAAACAG
SM21 GAAAGCGCATTCTCTTTCGATTTTTTAAAAAAAGTGATGAGGTAATAAGTCCTGCTGTTTTCCAAAAATAGAAAACAG
CYBS9 GAAAGCGCATTCTCTTTCGATTTTTTAAAAAAAGTGATGAGGTAATAAGTCCTGCTGTTTTCCAAAAATAGAAAACAG
CYBS14 GAAAGCGCATTCTCTTTCGATTTTTTAAAAAAAGTGATAAAGGTAATAAGTCCTGCTGTTTTCCAAAAATAGAAAACAG
CYBS26 GAAAGCGCATTCTCTTTCGATTTTTTAAAAAAAGTGATAAAGGTAATAAGTCCTGCTGTTTTCCAAAAATAGAAAACAG
CYBS54 GAAAGCGCATTCTCTTTCGATTTTTTAAAAAAAGTGATAAAGGTAATAAGTCCTGCTGTTTTCCAAAAATAGAAAACAG
*****.*****.:*****.*****.*****.*****

```

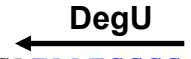

```

3610 TTTGTAGGTATAAAAATCTCTTTCAAAGAGAAGTTTGGCTTAGTCGATTAGGGAAGATTATGTTACATAATGCCG
SM21 TTTGTAGGTATAAAAATCTCTTTCAAAGAGAAGTTTGGCTTAGTCGATTAGGGAAGATTATGTTACATAATGCCG
CYBS9 TTTGTAGGTATAAAAATCTCTTTCAAAGAGAAGTTTGGCTTAGTCGATTAGGGAAGATTATGTTACATAATGCCG
CYBS14 TTTGTAGGTATAAAAATCTCTTTCAAAGAGAAGTTTGGCTTAGTCGATTAGGGAAGATTATGTTACATAATGCCG
CYBS26 TTTGTAGGTATAAAAATCTCTTTCAAAGAGAAGTTTGGCTTAGTCGATTAGGGAAGATTATGTTACATAATGCCG
CYBS54 TTTGTAGGTATAAAAATCTCTTTCAAAGAGAAGTTTGGCTTAGTCGATTAGGGAAGATTATGTTACATAATGCCG
*****

```

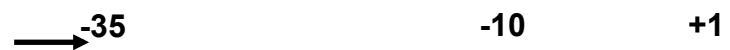

```

3610 ATTGAGAATTCATAGTGATTCTATATACTGATGAATGAATTTACAACAATATAGAAGGAGATGTCGAAAAGCA
SM21 ATTGAGAATTCATAGTGATTCTATATACTGATGAATGAATTTACAACAATATAGAAGGAGATGTCGAAAAGCA
CYBS9 ATTGAGAATTCATAGTGATTCTATATACTGATGAATGAATTTACAACAATATAGAAGGAGATGTCGAAAAGCA
CYBS14 ATTGAGAATTCATAGTGATTCTATATACTGATGAATGAATTTACAACAATATAGAAGGAGATGTCGAAAAGCA
CYBS26 ATTGAGAATTCATAGTGATTCTATATACTGATGAATGAATTTACAACAATATAGAAGGAGATGTCGAAAAGCA
CYBS54 ATTGAGAATTCATAGTGATTCTATATACTGATGAATGAATTTACAACAATATAGAAGGAGATGTCGAAAAGCA
*****.**:*****

```

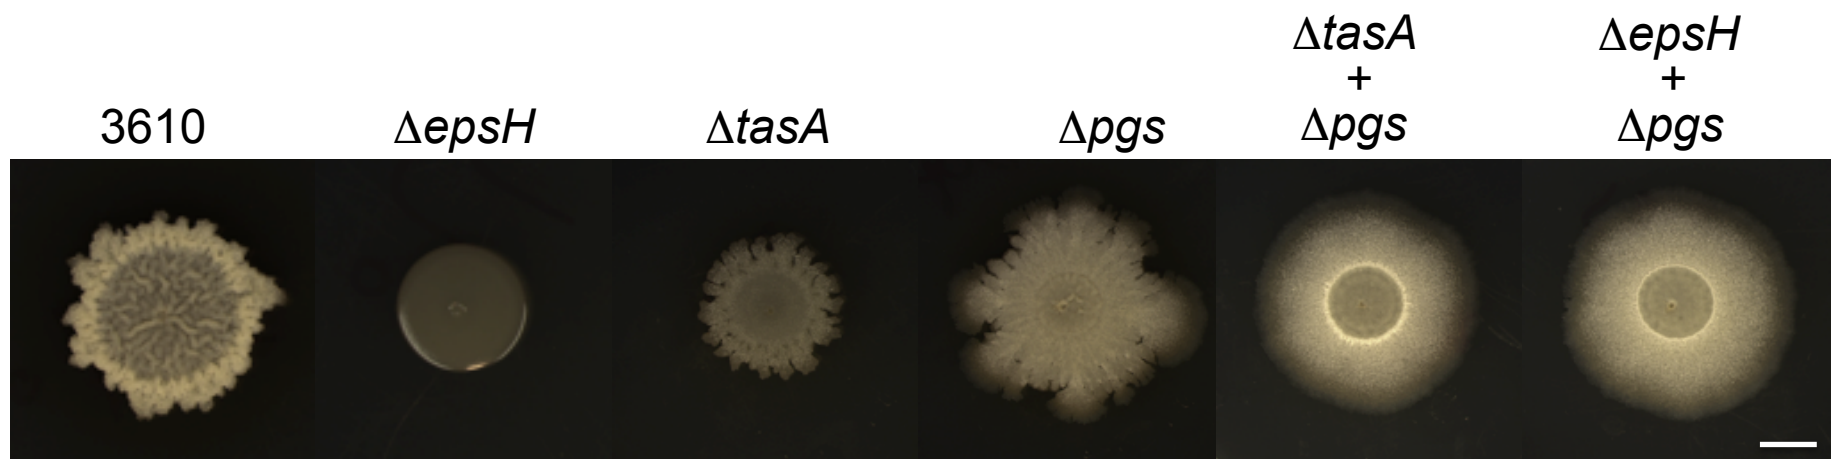

Supplemental Figure 3

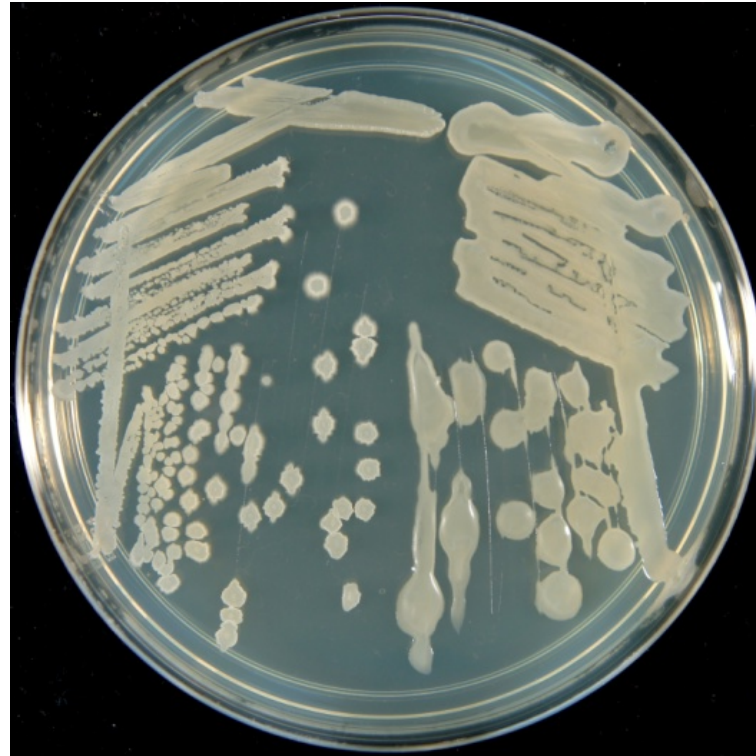

3610

$\Delta motA$

## Supplemental figure legends

**Fig. S1.** SDS-PAGE for methylene blue stained samples containing purified  $\gamma$ -PGA from the environmental isolates CYBS54, CYBS26 and their corresponding  $\Delta epsH\Delta tasA$  double mutants. Purification of PGA was described in the Methods.

**Fig. S2. DNA sequence alignment of the *pgs* promoter regions from various *B. subtilis* environmental strains.** The *pgs* promoter sequences were obtained by PCR amplification of the corresponding regions using genomic DNAs from selected *B. subtilis* environmental strains and primers P<sub>*pgsA*</sub>-F1 and P<sub>*pgsA*</sub>-R1 (Table S1) and by DNA sequencing. The DNA sequence alignment was performed by using the program ClustalW (<http://www.genome.jp/tools/clustalw/>). The columns with nucleotide polymorphism are highlighted in yellow and green. Yellow represents consensus while green indicates changes. The -10 and -35 motifs of the sigma A-dependent promoter, and the transcription start (+1) were experimentally confirmed and are indicated here (1). A CcpA binding site (*cre* box) was also experimentally characterized in a previous study (2) and indicated here.

**Fig. S3. Biofilm complementation by various matrix mutants.** Shown here are colony biofilms on LBG agar plates formed by the wild type (3610), the  $\Delta epsH$  mutant (RL3852), the  $\Delta tasA$  mutant (SB505), the  $\Delta pgs$  mutant (FY6), a 1:1 mixture of the  $\Delta tasA$  and  $\Delta pgs$  mutants, and a 1:1 mixture of  $\Delta epsH$  and  $\Delta pgs$  mutants. 2- $\mu$ l log phase cells were spotted onto the center of the plates and incubated at 37°C for 2 days before images were taken. The scale bar represents 5 mm in length.

**Fig. S4. The  $\Delta motA$  mutant shows a colony mucoidy phenotype.** The wild type strain (3610) and the  $\Delta motA$  mutant in 3610 (CY258) were streaked out on the LB agar plate and incubated for 16 hours at 37°C before the picture was taken.

## Supplemental references

1. Ohsawa T, Tsukahara K, Ogura M. 2009. *Bacillus subtilis* Response Regulator DegU Is a Direct Activator of *pgsB* Transcription Involved in  $\gamma$ -Poly-glutamic Acid Synthesis. *Bioscience, Biotechnology, and Biochemistry* **73**:2096-2102.
2. Ishii H, Tanaka T, Ogura M. 2013. The *Bacillus subtilis* Response Regulator Gene degU Is Positively Regulated by CcpA and by Catabolite-Repressed Synthesis of ClpC. *Journal of Bacteriology* **195**:193-201.

**Table S1. Oligonucleotides used in this study.**

| <b>Primer name</b> | <b>Primer sequence (5'-3')</b>            |
|--------------------|-------------------------------------------|
| pdgS-P1            | AAGATACGCTTGGAGAATTTGCGAAGCAAA            |
| pdgS-P2            | CAATTCGCCCTATAGTGAGTCGTTTTTATTATCTCCTCCTC |
| pdgS-P3            | CCAGCTTTTGTTCCTTTAGTGAGAAGTATACGGGTGCAATA |
| pdgS-P4            | CGATTTAGGTGTATAATGAACGGGATGGCG            |
| pgs-P1             | CGCCGTTAAATCGGTCTTGAGCG                   |
| pgs-P2             | CAATTCGCCCTATAGTGAGTCGTGTATGACAGCACAGGCTA |
| pgs-P3             | CCAGCTTTTGTTCCTTTAGTGAGAAGTATACGGGTGCAATA |
| pgs-P4             | CGATTTAGGTGTATAATGAACGGGATGGCG            |
| PpgsB-F1           | GTACAAGCTTATGACCTTGTCCTTAAGAAACAG         |
| PpgsB-R1           | GTACGGATCCCTTCTATATTGTTGTAATTC            |
